# Supplementary material for: Gallium(III) Complex with Cloxyquin Ligands Induces Ferroptosis in Cancer Cells and Is a Potent Agent against Both Differentiated and Tumorigenic Cancer Stem Rhabdomyosarcoma Cells
Source: Hindawi journal article supplement (doi:10.1155/2022/3095749), 2022-01-01
Supplement: f1 [file 3095749.f1.pdf]

# Supporting Information

for

Gallium(III) complex with cloxyquin ligands induces ferroptosis in cancer cells and is a potent agent against both differentiated and tumorigenic cancer stem rhabdomyosarcoma cells

Monika Hreusova,<sup>a</sup> Vojtech Novohradsky,<sup>a</sup> Lenka Markova,<sup>a</sup> Hana Kostrhunova,<sup>a</sup> Ivan Potočník,<sup>b</sup> Viktor Brabec<sup>a,c</sup> and Jana Kasparkova<sup>a\*</sup>

<sup>a</sup>Czech Academy of Sciences, Institute of Biophysics, Kralovopolska 135, 612 65 Brno, Czech Republic.

<sup>b</sup>Department of Inorganic Chemistry, Institute of Chemistry, P. J. Šafárik University in Košice, Moyzesova 11, 040 01 Košice, Slovakia

<sup>c</sup>Department of Biophysics, Faculty of Science, Palacký University, Šlechtitelů 27, 783 71 Olomouc, Czech Republic

## Table of Contents

|                                                                                                |    |
|------------------------------------------------------------------------------------------------|----|
| Emission fluorescence spectra of <b>1</b> and free cloxyquin (HClQ) (Figure S1)                | S1 |
| Flow cytometry-based profiling of autophagy in RD cells (Figure S2)                            | S2 |
| Detection of ROS in RD cells by flow cytometry (Figure S3)                                     | S3 |
| Histograms of lipid peroxidation in RD cells analyzed by flow cytometry (Figure S4)            | S4 |
| Bright-field images of the rhabdospheres formed from RD CD133+ and RD CD133- cells (Figure S5) | S5 |

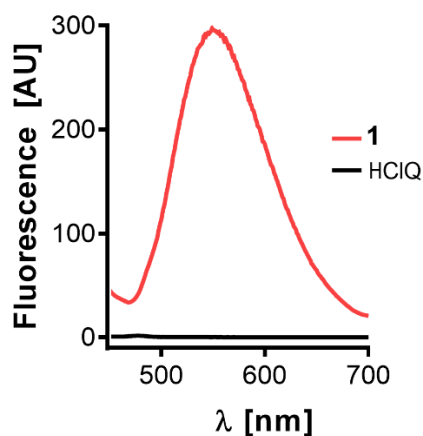

**Figure S1:** Emission fluorescence spectra of **1** and free cloxyquin (HClQ) at their 50  $\mu$ M concentrations in Tris.Cl, pH 7.4 + 1 % DMSO;  $\lambda_{\text{ex}} = 410$  nm.

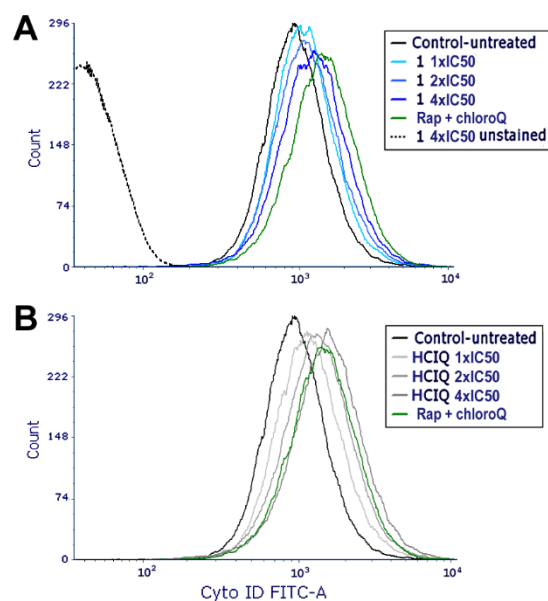

**Figure S2:** Flow cytometry-based profiling of autophagy in RD cells. Cells were untreated (black line) or treated with **1** (A) or cloxyquin (B) at their equitoxic concentrations corresponding to 1, 2, and 4- times the  $IC_{50,72h}$  values. According to the manufacturer's recommendation, a mixture of Rapamycin (Rap, 1  $\mu$ M) + Chloroquine (chloroQ, 100  $\mu$ M) was included in the analyses as a positive control. After staining with CYTO-ID® Detection Reagent, cells were washed and analyzed by flow cytometry. Results are presented as histogram overlay, a representative histograms of two experiments are shown. Unstained controls were treated with **1** but not with CYTO-ID® reagent to verify that the resulting signal is not affected by the inherent fluorescence of **1**.

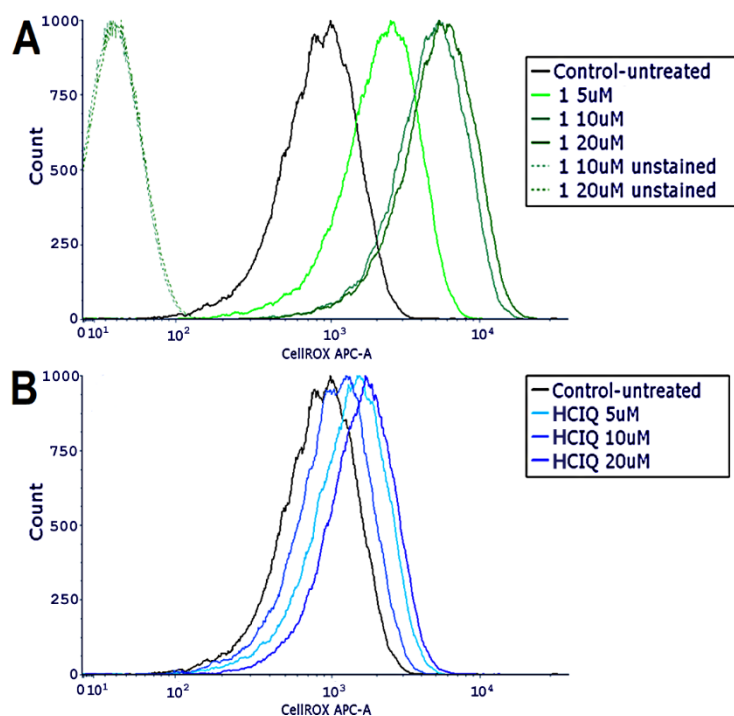

**Figure S3:** Detection of ROS in RD cells by flow cytometry. Cells were treated with increasing concentration of tested compounds for 3 h and subsequently stained with CellROX-deep red reagent for quantification of ROS. A) Cells treated with **1**. B) cells treated with ClQ ligand. Presented histograms are the representatives of two independent experiments. Unstained controls were treated with **1** but not with CellRox reagent to verify none fluorescent overlaps due to the inherent fluorescence of **1**.

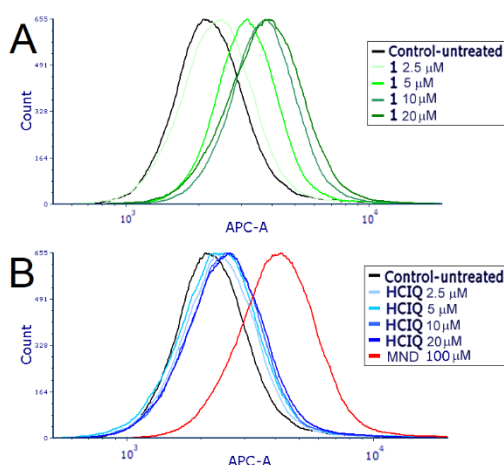

**Figure S4:** Representative histograms of lipid peroxidation in RD cells analyzed by flow cytometry. Cells were treated for 3 h with an increasing concentration of **1** (A) or HClQ (B). Positive control menadione (MND) was also included in the experiment (shown in panel B). Samples were stained with Bodipy<sup>TM</sup> 665/676 lipid peroxidation sensor.

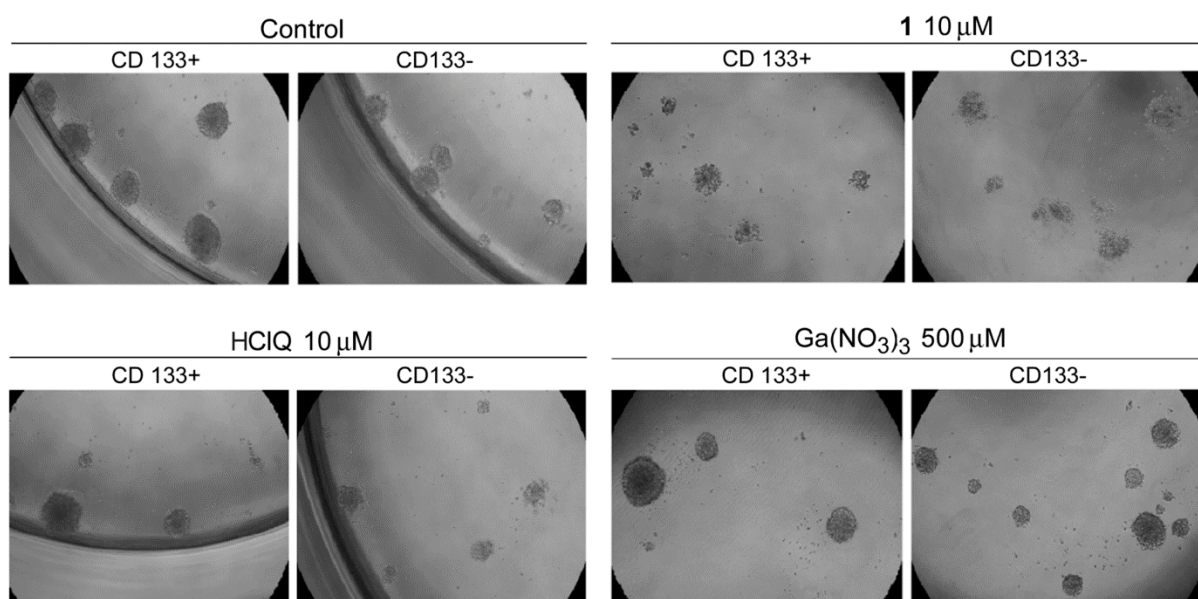

**Figure S5:** Representative bright-field images of the rhabdospheres formed from RD CD133+ and RD CD133- cells obtained after 72 h of the treatment with the indicated concentrations of **1** and ClQ.
